# Supplementary material for: Association of Fine Particulate Matter Constituents with the Predicted 10-Year Atherosclerotic Cardiovascular Disease Risk: Evidence from a Large-Scale Cross-Sectional Study
Source: MDPI journal article supplement (doi:10.3390/toxics11100812), 2023-09-26
Supplement: s1 [file s1]

## **Supplementary appendix**

This appendix formed part of the original submission and has been peer reviewed. We post it as supplied by the authors.

**Supplement to:** Association of PM<sub>2.5</sub> constituent with the predicted 10-year atherosclerotic cardiovascular disease: evidence from a large-scale rural population study

### **Authors:**

Sheng Wang <sup>1†</sup>, Ge Zhao <sup>1†</sup>, Caiyun Zhang <sup>2</sup>, Ning Kang <sup>2</sup>, Wei Liao <sup>2</sup>, Chongjian Wang <sup>2\*</sup>, Fuwei Xie <sup>1,\*</sup>

### **Authors affiliations:**

1 Key Laboratory of Tobacco Chemistry, Zhengzhou Tobacco Research Institute of CNTC, Zhengzhou, PR China

2 Department of Epidemiology and Biostatistics, College of Public Health, Zhengzhou University, Zhengzhou, Henan, PR China

\* Correspondence: Prof. Chongjian Wang: [tjwcj2008@zzu.edu.cn](mailto:tjwcj2008@zzu.edu.cn), Dr. Fuwei Xie: [xiefuwei@sina.com](mailto:xiefuwei@sina.com)

† These authors contributed equally to this work.

### **\* Correspondence author**

Dr. Fuwei Xie, and Prof. Chongjian Wang

Key Laboratory of Tobacco Chemistry

Zhengzhou Tobacco Research Institute of CNTC

Fengyang Street #2, Zhengzhou, 450001, Henan, PR China

Phone: +86 371 67781452

Fax: +86 371 67781919

E-mail: [xiefuwei@sina.com](mailto:xiefuwei@sina.com) & [tjwcj2008@zzu.edu.cn](mailto:tjwcj2008@zzu.edu.cn)

## Expand methods

Detailed information on the constituent concentration, proportion and residual analyses

The three methods could be expressed as follows:

$$\text{Logit}(P) = \beta_0 + \beta_1(\text{constituent or PM}_{2.5}) + [\gamma'X] \quad (\text{a})$$

$$\text{Logit}(P) = \beta_0 + \beta_1(\text{constituent/PM}_{2.5}) + \beta_2(\text{PM}_{2.5}) + [\gamma'X] \quad (\text{b})$$

$$\text{Logit}(P) = \beta_0 + \beta_1(\text{residual}) + [\gamma'X] \quad (\text{c})$$

Formula (a) was constituent concentration analyses, formula (b) was constituent proportion analyses, and formula (c) was constituent residual analyses.  $P$  represented the probability of a positive result occurring.  $\beta_0$  was the intercept,  $\beta_1$  was the coefficient of exposure to  $\text{PM}_{2.5}$  or its constituent and  $[\gamma'X]$  was the matrix of other covariates, residual reflected the levels of variation in the constituents, which were independent of  $\text{PM}_{2.5}$  and was calculated as the residuals of linear regression models: consistent =  $\beta_0 + \beta_1 (\text{PM}_{2.5})$ .

Detailed information on the isochronous substitution model (ISM)

In the ISM with one of the constituents removed, total  $\text{PM}_{2.5}$  concentration and other constituents were included in this model to determine the effect of replacing  $1 \mu\text{g}/\text{m}^3$  of one constituent with equivalent another constituent through logistic regression models. For example, when we calculated the effect of replacing  $1 \mu\text{g}/\text{m}^3$  other constituents with BC, the formula was as follows:

$$\text{logit}(P) = \beta_0 + \beta_1(\text{NH}_4^+) + \beta_2(\text{NO}_3^-) + \beta_3(\text{OM}) + \beta_4(\text{SO}_4^{2-}) + \beta_5(\text{SOIL}) + \beta_6(\text{Other}) + \beta_7(\text{PM}_{2.5}) + [\gamma'X]$$

$P$  represented the probability of high 10-year ASCVD risk occurring.  $\beta_0$  was the intercept.  $\beta_1$  was the effect of replacing  $1 \mu\text{g}/\text{m}^3 \text{NH}_4^+$  with  $1 \mu\text{g}/\text{m}^3 \text{BC}$ . By parity of reasoning,  $\beta_2$  represents the effect of replacing  $1 \mu\text{g}/\text{m}^3 \text{NO}_3^-$  with  $1 \mu\text{g}/\text{m}^3 \text{BC}$ . The concentration of other constituent was calculated by subtracting the concentration of BC,  $\text{NH}_4^+$ ,  $\text{NO}_3^-$ , OM,  $\text{SO}_4^{2-}$  and SOIL from the concentration of  $\text{PM}_{2.5}$ .  $[\gamma'X]$  was matrix of other covariates.

## **Table Legend**

**Supplementary table S1.** Distributions of 3-year averaged concentrations of PM<sub>2.5</sub> and its constituents.

## **Figure Legends**

**Supplementary Figure S1.** Correlation between 3-year averaged concentrations of PM<sub>2.5</sub> and its constituents.

**Supplementary Figure S2.** Sensitive analyses of the association between exposure to PM<sub>2.5</sub> and its constituents and ASCVD risk at different time scales.

**Supplementary table S1.** Distributions of 3-year averaged concentrations of PM<sub>2.5</sub> and its constituents.

| Variables                                                  | Mean $\pm$ SD      | Min    | Percentiles     |                 |                 | Max    | IQR    |
|------------------------------------------------------------|--------------------|--------|-----------------|-----------------|-----------------|--------|--------|
|                                                            |                    |        | P <sub>25</sub> | P <sub>50</sub> | P <sub>75</sub> |        |        |
| PM <sub>2.5</sub> ( $\mu\text{g}/\text{m}^3$ )             | 75.24 $\pm$ 9.600  | 48.970 | 65.960          | 80.160          | 82.810          | 94.090 | 16.850 |
| Constituents                                               |                    |        |                 |                 |                 |        |        |
| BC ( $\mu\text{g}/\text{m}^3$ )                            | 5.190 $\pm$ 0.947  | 3.160  | 4.200           | 5.650           | 6.120           | 7.110  | 1.920  |
| NH <sub>4</sub> <sup>+</sup> ( $\mu\text{g}/\text{m}^3$ )  | 10.694 $\pm$ 1.431 | 6.800  | 9.300           | 11.170          | 11.730          | 13.620 | 2.430  |
| NO <sub>3</sub> <sup>-</sup> ( $\mu\text{g}/\text{m}^3$ )  | 18.016 $\pm$ 2.619 | 10.120 | 15.720          | 19.110          | 19.840          | 23.330 | 4.120  |
| OM ( $\mu\text{g}/\text{m}^3$ )                            | 15.659 $\pm$ 1.746 | 8.840  | 14.330          | 15.710          | 17.210          | 19.730 | 2.880  |
| SO <sub>4</sub> <sup>2-</sup> ( $\mu\text{g}/\text{m}^3$ ) | 14.624 $\pm$ 1.827 | 10.370 | 12.640          | 15.190          | 16.080          | 18.320 | 3.440  |
| SOIL ( $\mu\text{g}/\text{m}^3$ )                          | 9.655 $\pm$ 1.579  | 6.940  | 8.360           | 9.130           | 11.760          | 14.030 | 3.400  |

Abbreviation: PM<sub>2.5</sub>, fine particulate matter; BC, black carbon; NH<sub>4</sub><sup>+</sup>, ammonium; NO<sub>3</sub><sup>-</sup>, nitrate; OM, organic matter; SO<sub>4</sub><sup>2-</sup>, sulfate; SOIL, soil particles.

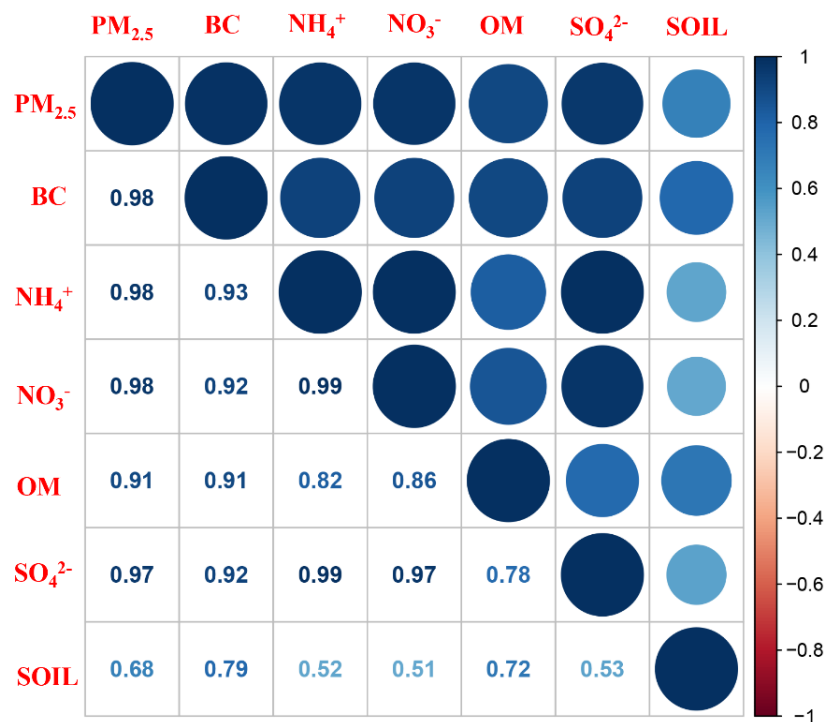

**Supplementary Figure S1.** Correlation between 3-year averaged concentrations of PM<sub>2.5</sub> and its constituents.

Abbreviation: PM<sub>2.5</sub>, fine particulate matter; BC, black carbon; NH<sub>4</sub><sup>+</sup>, ammonium; NO<sub>3</sub><sup>-</sup>, nitrate; OM, organic matter; SO<sub>4</sub><sup>2-</sup>, sulfate; SOIL, soil particles.

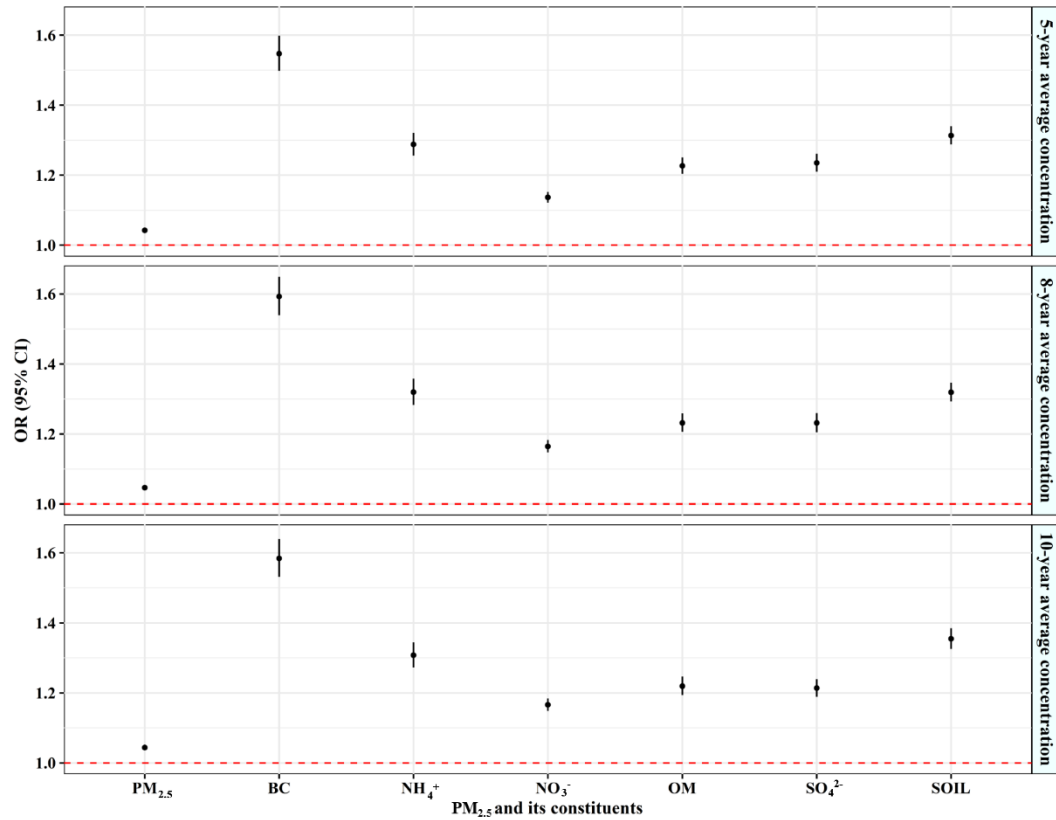

**Supplementary Figure S2.** Sensitive analyses of the association between exposure to PM<sub>2.5</sub> and its constituents and ASCVD risk at different time scales.

Abbreviation: PM<sub>2.5</sub>, fine particulate matter; BC, black carbon; NH<sub>4</sub><sup>+</sup>, ammonium; NO<sub>3</sub><sup>-</sup>, nitrate; OM, organic matter; SO<sub>4</sub><sup>2-</sup>, sulfate; SOIL, soil particles; ASCVD: atherosclerotic cardiovascular disease.

Models were adjusted for gender, marital status, average monthly income, educational level, physical activity, drinking status, high fat diet, fruit and vegetable intake.
